# Supplementary material for: Broadband and large surface enhancements of the local electric field enabled by cross-etched hyperbolic metamaterials
Source: Royal Society of Chemistry journal article supplement (doi:10.1039/d4nr04039b), 2025-01-01
Supplement: d4nr04039b1.pdf [file d4nr04039b1.pdf]

## Supporting Information

### Broadband and large surface enhancements of local electric field enabled by cross-etched hyperbolic metamaterials

Zixian Li<sup>1</sup>, Houjiao Zhang<sup>1</sup>, Zhonghong Shi<sup>1</sup>, Haoyang Li<sup>1</sup>, Guoli He<sup>1</sup>, Shuang Qiu<sup>1</sup>,

Zhang-Kai Zhou<sup>1, \*</sup>

<sup>1</sup>State Key Laboratory of Optoelectronic Materials and Technologies, School of

Physics, Sun Yat-Sen University, Guangzhou 510275, China

**Email:** zhouzhk@mail.sysu.edu.cn

### Content

Fig. S1 Permittivity dispersion of multilayer Au/Al<sub>2</sub>O<sub>3</sub> HMMs.

Fig. S2 Optical properties of the CeHMMs and normal HMMs.

Fig. S3 The EF distributions of nanorod HMMs.

Fig. S4 The EF enhancement distribution of a periodically square-etched HMMs

Fig. S5 The wavelength dependence of EF enhancements under LCP incidence

Fig. S6 The influence of the hyperbolic parameter.

Fig. S7 EF enhancement distributions on the surface in Mode L

Fig. S8 EF enhancements between the wavelength and different *xy* surface of the CeHMMs

Fig. S9 EF enhancements between the wavelength and different *xy* surface of the LeHMMs

Fig. S10 The reflection spectra under elliptically polarized light with phase difference.

Fig. S11 The maximum value of  $f_0$  decreases with the increasing of  $z$

Fig. S12 Focused Ion Beam (FIB) technology.

Fig. S13 Approximation and calculation of the average Purcell factor

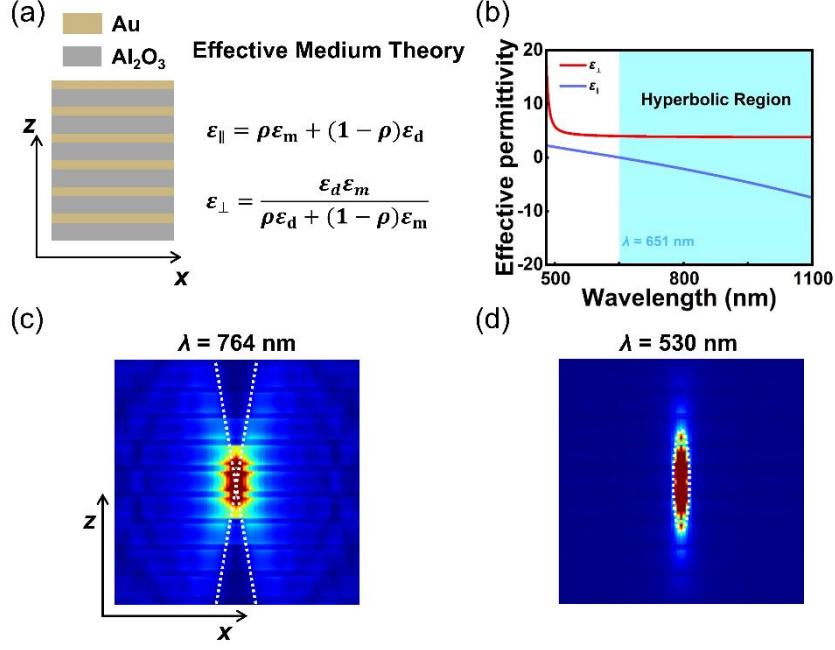

**Fig. S1** Permittivity dispersion of multilayer Au/Al<sub>2</sub>O<sub>3</sub> HMMs. (a)  $xz$  profile model and Effective Medium Theory. (b) Hyperbolic dispersion relation of effective permittivity components for multilayer HMMs ( $\rho = 0.2$ ). (c) The EF distribution of the HMMs excited by a dipole source in its center at  $\lambda = 764$  nm and (d)  $\lambda = 530$  nm.

In this paper, the alternating 5 nm Au layer and 20 nm Al<sub>2</sub>O<sub>3</sub> layer form the multilayer HMMs, as shown in Fig. S1a. Its effective permittivity components  $\epsilon_{\parallel} = \epsilon_{xx} = \epsilon_{yy}$  and  $\epsilon_{\perp} = \epsilon_{zz}$  can be approximated by Effective Medium Theory (*Nature Photonics*, 7(12), 948-957), where the  $\rho$  representing the volume fraction of the metal, and  $\epsilon_m$  and  $\epsilon_d$  is the permittivity of the metal (Au) and the dielectric (Al<sub>2</sub>O<sub>3</sub>), respectively. When the thickness of a metal/dielectric layer is much smaller than the wavelength, the approximate result given by the formula is remarkable.

The multilayer HMMs can achieve opposite signs for  $\epsilon_{\parallel}$  and  $\epsilon_{\perp}$  at  $\lambda > 651$  nm (Fig. S1b), thus realizing a hyperbolic wavevector Iso-Frequency Contour (IFC). It is meaning that the HMMs can exhibit a unique hyperbolic EF distribution, and can excited by the dipole source placed in HMMs (Fig. S1c and Fig. S1d). It is clear that a hyperbolic wavevector IFC is discernible at  $\lambda = 764$  nm, whereas at  $\lambda = 530$  nm, only an elliptical wavevector IFC is detectable. This observation indicates that the multilayer HMMs in this work exhibits hyperbolic characteristics for wavelengths exceeding 651 nm.

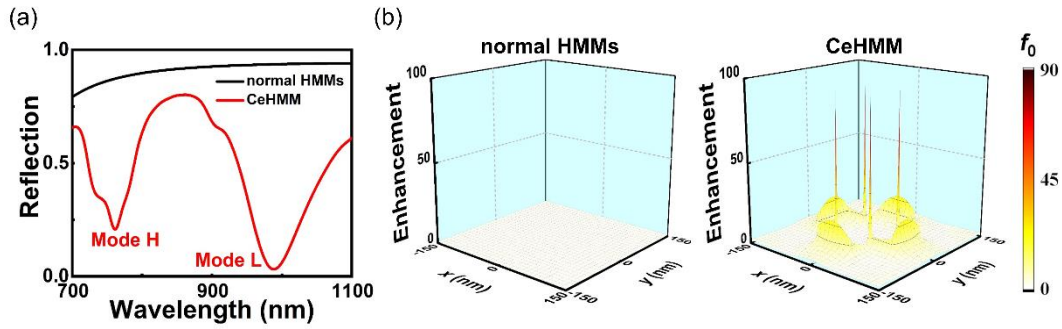

**Fig. S2.** The comparison of the CeHMMs and normal HMMs. (a) Reflection spectra of CeHMMs (red curve) and normal HMMs (black curve). Compare with the CeHMMs, the normal HMMs exhibit reflection valleys, indicating the failure of sustaining resonant modes under the incident light from free space. (b) The EF enhancement distributions of the CeHMMs (right,  $f_0$  up to 90) and the normal HMMs (left,  $f_0 \sim 1.5$ ) at the incident wavelength of 764 nm. The incident light is left-handed circularly polarized (LCP) in Fig. S2.  $f_0$  is the EF enhancement factor which is defined as  $f_0 = |E/E_0|$  ( $E$  and  $E_0$  are the EF enhancement under incident light excitation and in free space, respectively).

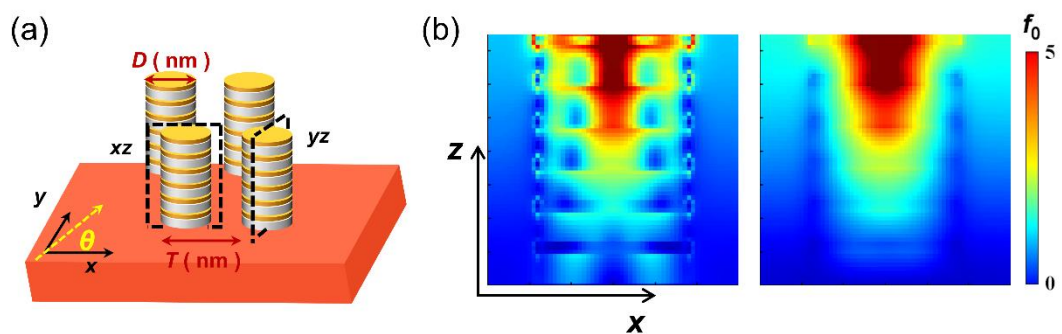

**Fig. S3.** The EF distributions of nanorod HMMs. (a) Schematic diagram of nanorod HMMs with linearly polarized light incidence (polarization angle  $\theta = 90^\circ$ ). The diameter  $D = 180$  nm, and the period  $T = 300$  nm. (b) The EF enhancement distributions of  $xz$  and  $yz$  profiles (dashed boxes in Fig. S3a) at  $\lambda = 649$  nm.

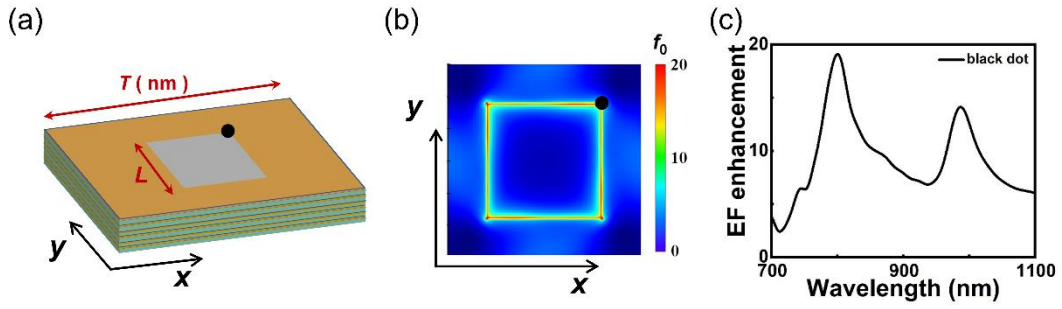

**Fig. S4.** (a) Schematic of a periodically square-etched HMMs structure under LCP incidence, with the square side length  $L = 180$  nm and the cell period  $T = 300$  nm. (b) The EF enhancement distribution on the top surface, with the black dot indicating the hot spot. (c) The wavelength dependence of EF enhancement at the hot spot.

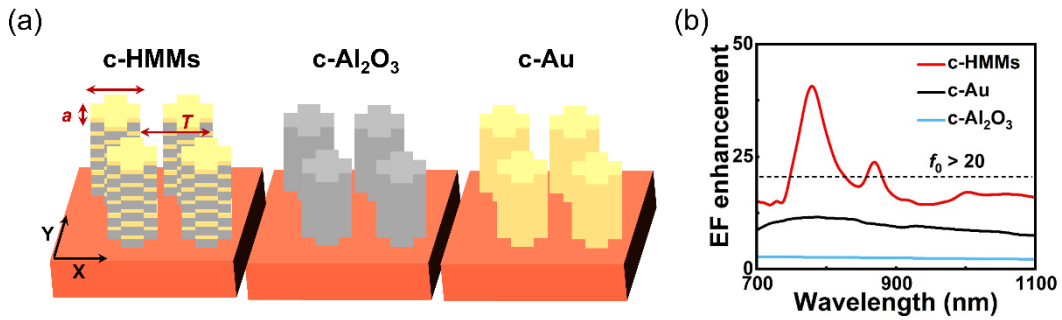

**Fig. S5.** The wavelength dependence of EF enhancements for the periodic c-HMMs, c-Au and c-Al<sub>2</sub>O<sub>3</sub> under LCP incidence (c is the short sign for the cross). (a) Schematic diagram of the cross structure, with the cross-patterned width  $a = 80$  nm, length  $b = 180$  nm and period  $T = 300$  nm. (b) Comparison of spectral ranges ( $f_0 > 20$ ) for these cross structures: c-HMMs (red curve), c-Au (black curve), and c-Al<sub>2</sub>O<sub>3</sub> (blue curve).

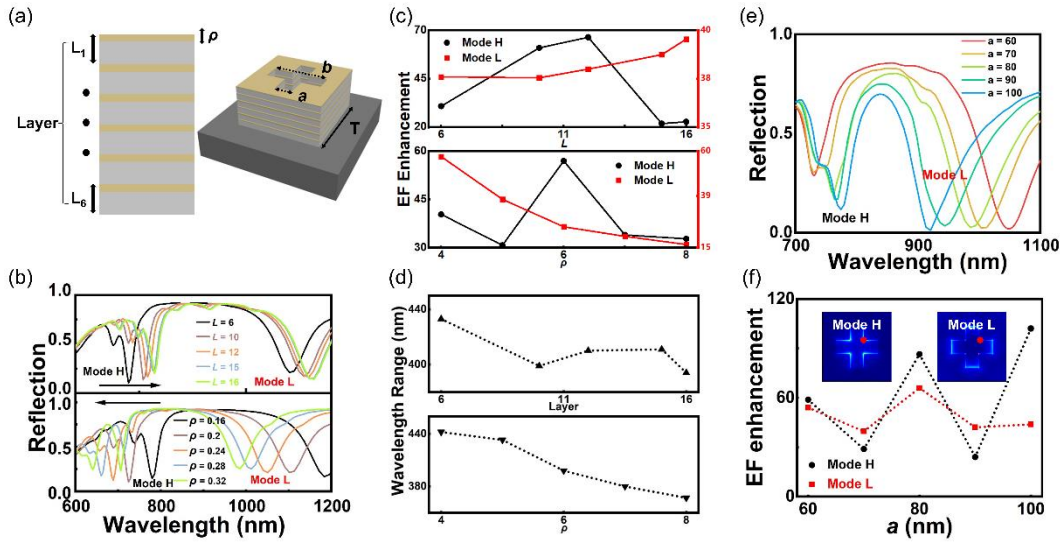

**Fig. S6.** The influence of the hyperbolic parameters ( $\rho$  and  $L$ ) and cross-shaped width  $a$ . (a) The schematic diagram of CeHMMs and its structural parameters.  $L$  is the number of metal/dielectric groups, and  $\rho$  is the metal volume fraction. The cross-shaped width  $a$ , length  $b$ , and structural period  $T$  are set as 80, 200, and 300 nm, respectively. The total thickness of multilayer CeHMMs is fixed at 150 nm. (b) Reflection spectra for different  $\rho$  and  $L$ . (c) EF enhancements at hot spots for Mode H (black) and Mode L (red) with varying  $\rho$  and  $L$ . (d) The spectral range of EF enhancements with  $f_0 > 20$  under varied  $\rho$  and  $L$ . (e) Reflection spectra and (f) EF enhancement at hot spots (red dots) within the illustration in Fig. S6d) for Mode H and Mode L with variation in width  $a$ , while keeping  $b = 180$  nm and  $T = 300$  nm fixed.

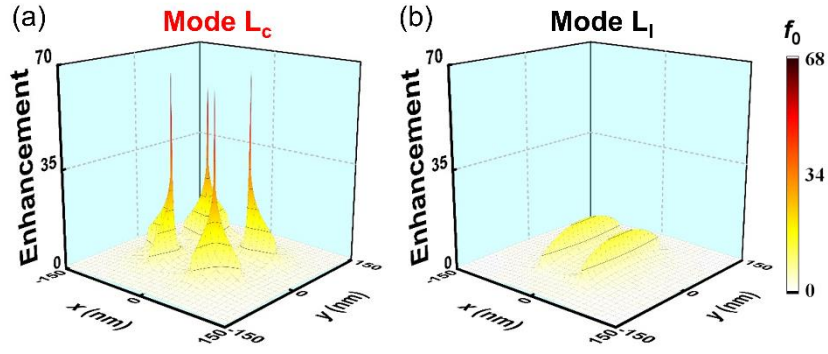

**Fig. S7.** EF enhancement distributions of Mode L on the surface ( $z = 0.5$  nm) for (a) the CeHMMs and (b) LeHMMs.

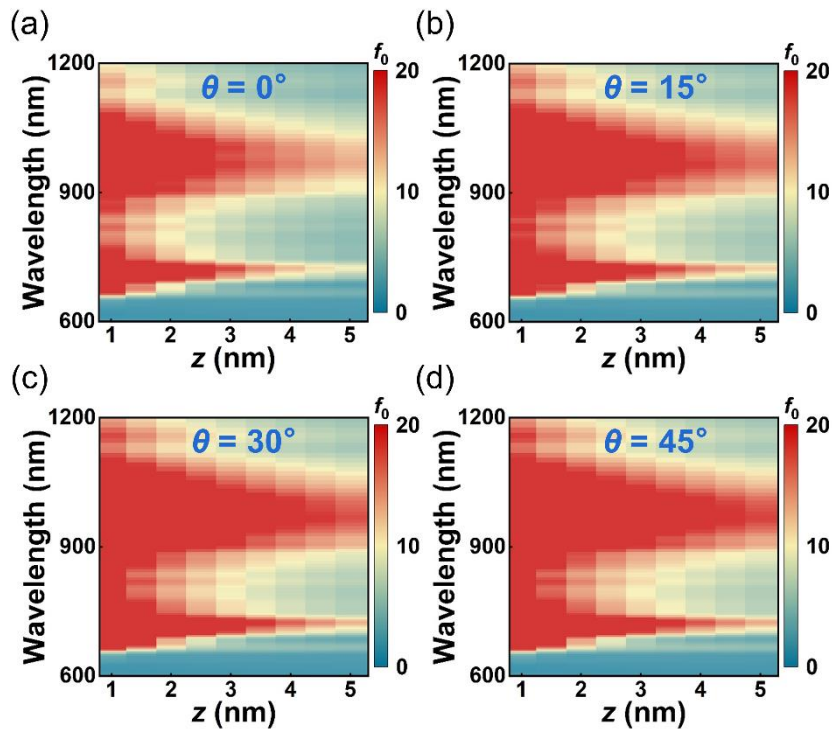

**Fig. S8.** Two-dimensional (2D) plots of EF enhancements as a function of the wavelength (600~1200 nm) and different  $xy$  surface ( $z$  ranging from 1 to 5 nm) of the CeHMMs, excited by LPL with different polarization angle ( $\theta$ ): (a)  $\theta = 0^\circ$ , (b)  $\theta = 15^\circ$ , (c)  $\theta = 30^\circ$ , (d)  $\theta = 45^\circ$ .

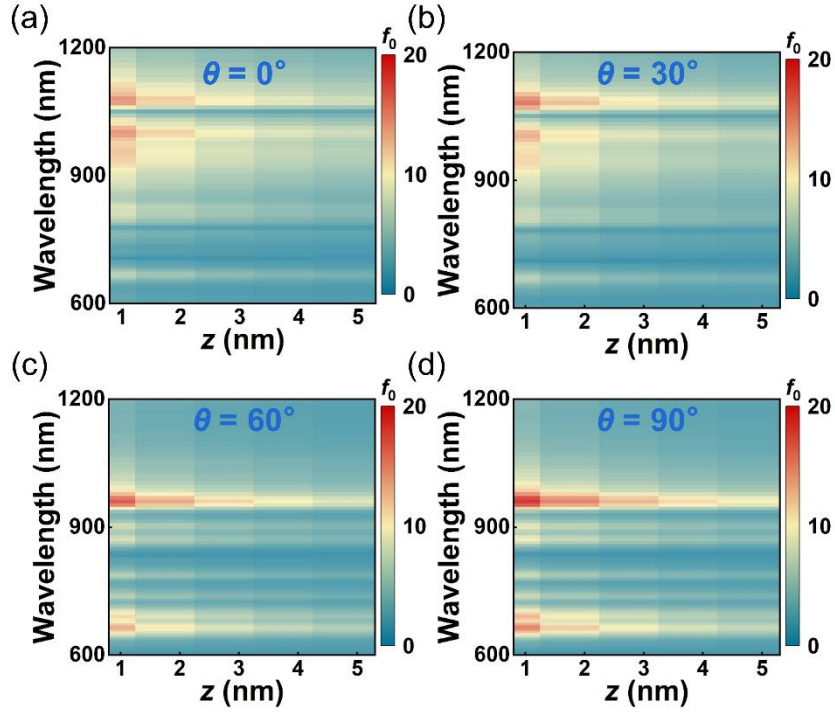

**Fig. S9.** 2D plots of EF enhancements as a function of the wavelength (600 ~ 1200 nm) and different  $xy$  surfaces ( $z$  ranging from 1 to 5 nm) of the LeHMMs, were stimulated by LPL with varying polarization angles ( $\theta$ ):  $\theta = 0^\circ$ , (b)  $\theta = 30^\circ$ , (c)  $\theta = 60^\circ$ , (d)  $\theta = 90^\circ$ . It is evident that CeHMMs demonstrates the more significant EF enhancement and the broader spectral range ( $f_0 > 20$ ) compared to LeHMMs.

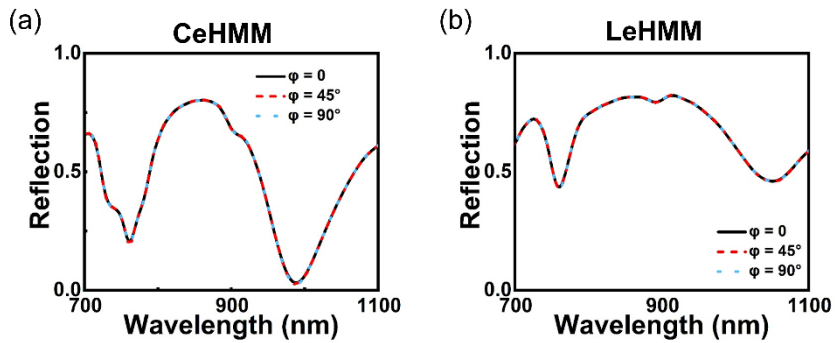

**Fig. S10.** For the (a) CeHMMs and (b) LeHMMs, their reflection spectra under elliptically polarized light with phase difference  $\varphi = 0^\circ$ ,  $45^\circ$  and  $90^\circ$ . Both structures exhibit polarization-independent properties with respect to  $\varphi$ .

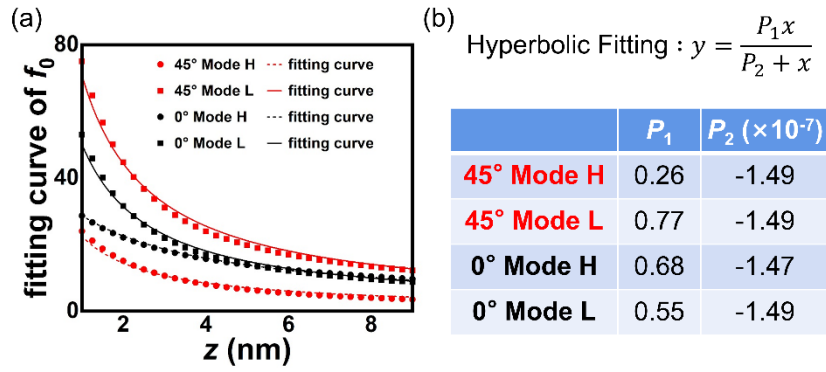

**Fig. S11.** The hyperbolic fitting curve of  $f_0$ . (a) The fitting curve for the decay variation of EF enhancements in Mode H and Mode L across the range of  $z = 1-9$  nm, excited by LPL with different polarization angle ( $\theta$ ):  $\theta = 45^\circ$  (red) and  $\theta = 0^\circ$  (black), solid and dashed lines represent the calculated values and fitted values of  $f_0$ , respectively. (b) Parameters derived from the hyperbolic fitting of all curves.

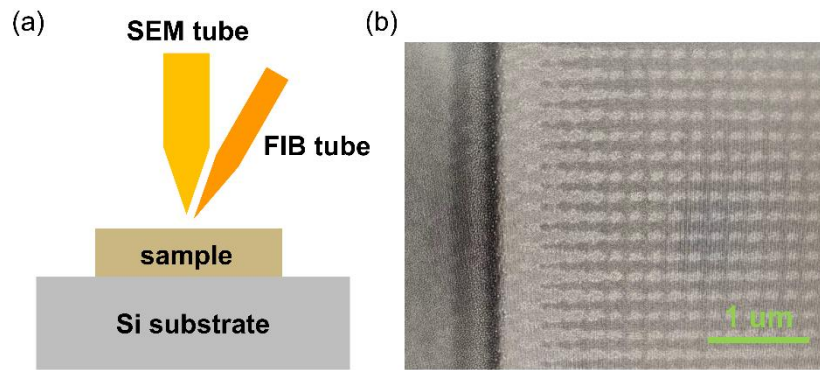

**Fig. S12.** Focused Ion Beam (FIB) technology. (a) Schematic diagram of FIB. (b) SEM image of the test sample etched by FIB technology. The precision of FIB-etched samples does not satisfy our required standards, whereas the EBL-etched samples (Fig. 5b-II) can demonstrate fabrication errors obviously smaller.



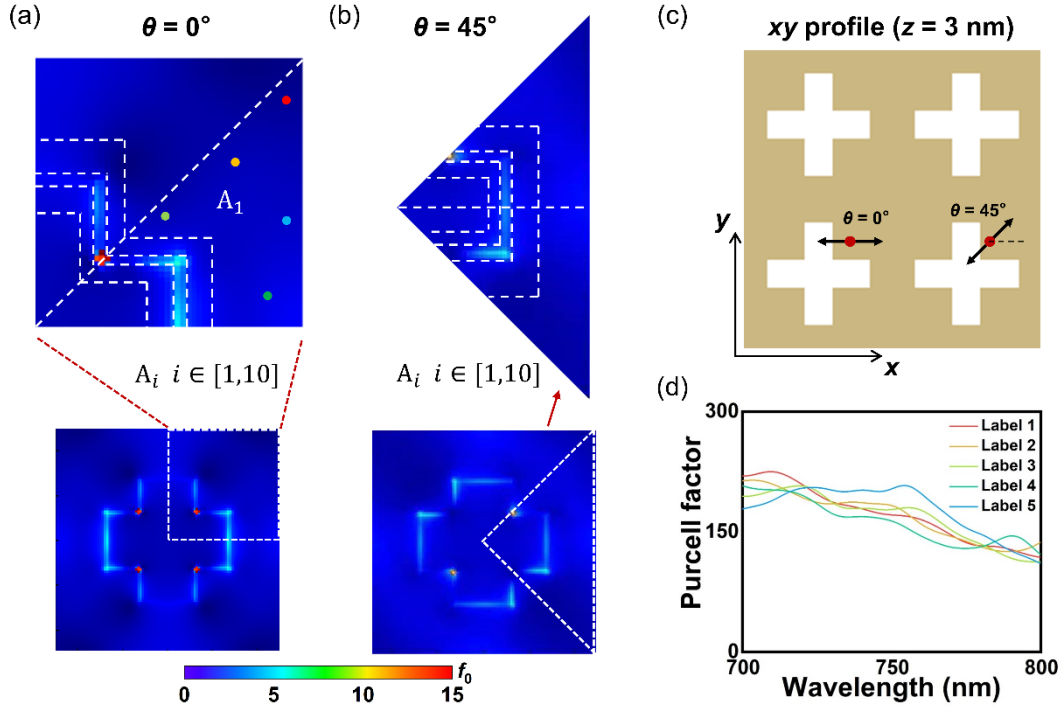

**Fig. S13.** Approximation and calculation of the average Purcell factor ( $P_f$ ). At (a)  $\theta = 0^\circ$  and (b)  $\theta = 45^\circ$  LPL incidence, the surface EF enhancement distributions of the CeHMMs. (c) The polarization directions of the dipole sources. (d) Random sampling in region  $A_1$  (colored points 1-5) generates the  $P_f$  curves in the wavelength range from 700 to 800 nm.

To estimate the PL enhancement of hotspot ( $F_{hs}$ ) from the experimentally measured average ( $F_{ave}$ ), the incident light must be considered when calculating the Purcell factor. Due to potential rotational misalignment of the  $WS_2$ /CeHMMs sample, different LPL need to be simulated. Fortunately, according to the structural symmetry, the EF enhancement distribution varies only between polarization angle  $\theta = 0^\circ$  and  $45^\circ$ , and  $f_0$  changes within a narrow range (0 to 15, see Fig. S13a and Fig. S13b). Thus, the Purcell factors for  $\theta = 0^\circ$  and  $45^\circ$  are averaged to approximate the average Purcell factor ( $P_{ave}$ ) of CeHMMs,

$$P_{ave} = \frac{P_{ave-0^\circ} + P_{ave-45^\circ}}{2} \quad (S1)$$

The Purcell factor was achieved by positioning a dipole at spatial spot and then simulating a transmission box region of  $4 \text{ nm} \times 4 \text{ nm} \times 4 \text{ nm}$ . Additionally, for linear incident light at  $\theta = 0^\circ$ , the polarization direction of dipole must be aligned with the  $x$  axis. And the  $\theta = 45^\circ$  needs to form an

angle of  $45^\circ$  with the  $x$ -axis.

Next, the calculations of  $P_{\text{ave-}0^\circ}$  and  $P_{\text{ave-}45^\circ}$  are divided into five steps. First, due to the characteristics of the EF enhancement distributions, only one-quarter of the regions in Fig. S13a and S13b are analyzed. Second, these quarter are divided into ten subregions ( $A_i$ ,  $i = 1, 2, \dots, 10$ ) based on the decay of the EF enhancement (Fig. S13a and S13b). Third, Purcell factors are calculated at selected spatial points ( $z = 3$  nm) within each  $A_i$  subregion, and their average value approximates average Purcell factor  $P_{\text{ave-}A_i}$  of  $A_i$  subregion, as follows:

$$P_{\text{ave-}A_i} = \sum_{m=1}^n \frac{P_{\text{ave-}m}}{n} \quad (\text{S2})$$

where  $n$  denotes the number of spatial points, and  $P_{\text{ave-}m}$  is the Purcell factor at point  $m$ . It is note that the choice of  $n$  is determined by the decay of the EF enhancement. Taking subregion  $A_1$  ( $n = 46$ ) as an example (Fig. S13a), five random points were selected for Purcell factor calculations, revealing minimal variation (160-200) within the wavelength range from 750 to 770 nm (Fig. S13c). This result validates the above calculated method of  $P_{\text{ave-}A_i}$ , enabling estimations from a limited number of spatial points.

Fourth, since both  $\theta = 0^\circ$  and  $\theta = 45^\circ$  are divided into ten subregions, we take  $\theta = 0^\circ$  as an example to obtain its  $P_{\text{ave-}0^\circ}$ :

$$P_{\text{ave-}0^\circ} = \sum_{i=1}^{10} \sigma_i \cdot P_{\text{ave-}A_i} \quad (\text{S3})$$

where  $P_{\text{ave-}A_i}$  denotes the average Purcell factor for the  $A_i$  subregion,  $i = 1, 2, \dots, 10$ , and  $\sigma_i$  represents the normalized area of the  $A_i$  subregion, defined as:

$$\sigma_i = \frac{S_i}{S_{\text{total}}} = \frac{S_i}{\sum_{i=1}^{10} S_i} \quad (\text{S4})$$

Finally, based on above method, the calculated values of  $P_{\text{ave-}0^\circ}$  and  $P_{\text{ave-}45^\circ}$  are 148 and 176 at  $\lambda = 764$  nm, respectively. Substituting these results into eq. S1 yields an approximate average Purcell factor of  $P_{\text{ave}} = 162$  for CeHMMs.

Similarly, in the main text,  $P_{\text{hs}}$  at hot spots is derived from the following equation:

$$P_{\text{hs}} = \frac{P_{\text{hs-}0^\circ} + P_{\text{hs-}45^\circ}}{2} = 1036 \quad (\text{S5})$$
